# Supplementary material for: A compendium and comparative analysis of hepatic transcriptome and chromatin accessibility in primiparous lactating cows with different nitrogen utilization efficiency
Source: Research Square preprint supplement (doi:10.21203/rs.3.rs-7262943/v1), 2025-09-12
Supplement: Supplementary file 1 [file c2d2355759b0a4ef23a3c048.docx]

**Supplementary Tables**

Table S1 Ingredient and chemical composition of experimental diets.

| Item | Content |
| --- | --- |
| Ingredients (% DM) |  |
| Corn silage | 32.56 |
| Alfalfa hay | 11.65 |
| Molasses cane | 3.38 |
| Urea | 0.21 |
| Soybean meal | 13.12 |
| Extruded soybean | 1.93 |
| Corn slice | 15.27 |
| Corn grain, ground | 13.06 |
| Cottonseed | 5.00 |
| Palmit1 | 1.29 |
| Mycotex2 | 0.08 |
| Premix3 | 2.45 |
| Chemical composition (% DM) |  |
| Organic matter | 91.37 |
| Crude protein | 17.25 |
| Ether extract | 4.9 |
| Neutral detergent fibre | 30.19 |
| Acid detergent fibre | 16.4 |
| Calcium | 0.76 |
| Phosphorus | 0.39 |
| Metabolizable protein (% DM) | 11.21 |
| Lysine (% of metabolizable protein) | 6.56 |
| Methionine (% of metabolizable protein) | 2.09 |
| Metabolic energy (Mcal/kg of DM) | 2.41 |
| Net energy for lactating cow (Mcal/kg of DM) | 1.46 |

1Palmit contains 92.1% palmitic acid, 4.6% oleic acid, stearic acid 1.3% and myristic acid 1.0%, produced by Wilmar Oil Technology (Tianjin) Co., Ltd.

2Produced by Shanghai Comiy Biotechnology Ltd, No. 33, Guangshun Rd, Changning Dist 200335 SHANGHAI.

3Contained per kg premix dry matter: 31.3 mg Co, 343.5 mg Cu, 2, 258 mg Fe, 1, 160 mg Mn, 1, 534 mg Zn, 40.3 mg I, 17.7 mg Se, 317.4 KIU vitamin A, 80.8 KIU vitamin D, and 3, 030 IU vitamin E.

Table S2 The primer of *ACTB* and target genes of liver.

| Target Gene | Primer sequence | Reference |
| --- | --- | --- |
| *ACTB* | F:AGATGACCCAGATCATGTTCGA | Foley, Chapwanya [1] |
| R:TGACCCCGTCACCGGAGTCCATCACGAT |
| *FASN* | F:TGGCACTAAGGGAGGTTGTC | Elis, Desmarchais [2] |
| R:GCCTGTCATCATCTGTCACC |
| *HBB* | F:CTGCTGCTTACACTTGCTTCTGACAC | Tanaka, Takizawa [3] |
| R:ATATTTTCTCAAGGTCTCGACTAGC |
| *LPL* | F:GGGTTTTGAGCAAGGGTACA | Elis, Desmarchais [2] |
| R:GCCACAATGACCTTTCCAGT |
| *PTN* | F:CACCAGCGACTTGGGTACCTG | Ibeagha-Awemu, Bissonnette [4] |
| R:ATTACAAGGGCTGAAGGAAGGAA |
| *ROR1* | F:TGTTGCCATGCTCTGAAGAC | Elis, Desmarchais [2] |
| R:TGGCACTAAGGGAGGTTGTC |
| *UHRF1* | F:GGGAATGATTCGTTAATGTTTCTAACTT | Perego, Morrell [5] |
| R:CTCCAGTTTGTCTGCAGTTATGTGA |

Table S3 Data evaluation and statistics for RNA-Seq experiments.

| Sample | Raw reads | Clean reads | Total mapped | Uniquely mapped | GC Content (%) | Q30(%) |
| --- | --- | --- | --- | --- | --- | --- |
| L1 | 48716614 | 47023674 | 45,407,329 (96.56%) | 43,826,587 (93.20%) | 50.00 | 94.34 |
| L2 | 46866188 | 45106262 | 43,359,809 (96.13%) | 41,769,176 (92.60%) | 51.38 | 94.30 |
| L3 | 54234308 | 52997572 | 51,074,483 (96.37%) | 49,354,894 (93.13%) | 50.90 | 94.39 |
| L4 | 45311470 | 43132138 | 41,667,419 (96.60%) | 39,964,947 (92.66%) | 50.84 | 94.45 |
| H1 | 57549522 | 56080324 | 53,769,670 (95.88%) | 51,853,206 (92.46%) | 51.06 | 94.28 |
| H2 | 45787912 | 44259030 | 42,469,234 (95.96%) | 41,054,870 (92.76%) | 50.76 | 94.18 |
| H3 | 64079166 | 60940498 | 58,625,551 (96.20%) | 56,586,072 (92.85%) | 51.29 | 94.36 |
| H4 | 48047820 | 46305208 | 44,417,324 (95.92%) | 42,759,749 (92.34%) | 50.40 | 93.85 |

Reference genome: ARS_UCD1.3.

Table S4 Data evaluation and statistics for ATAC-Seq experiments.

| Sample | Raw Reads | Clean Reads | Mapped Reads1 | Uniquely Mapped Reads | Duplication (%) | Q30 (%) |
| --- | --- | --- | --- | --- | --- | --- |
| L1 | 48486956 | 48349240 | 47816655  (98.90%) | 35931504  (74.31%) | 32.93 | 95.00 |
| L2 | 57063951 | 56953062 | 56124528  (98.55%) | 40885445  (71.78%) | 33.19 | 94.49 |
| L3 | 50289293 | 50174245 | 49549460  (98.75%) | 39013909  (77.75%) | 36.27 | 92.12 |
| L4 | 53044878 | 52974908 | 52126030  (98.40%) | 40630291  (76.69%) | 38.73 | 94.19 |
| H1 | 49161760 | 49070150 | 48555515  (98.95%) | 35500529  (72.34%) | 21.46 | 94.62 |
| H2 | 51089310 | 51036343 | 50934338  (99.80%) | 44201804  (86.6%) | 61.65 | 94.38 |
| H3 | 49867779 | 49742644 | 49140530  (98.79%) | 39316075  (79.03%) | 36.56 | 94.98 |
| H4 | 50321473 | 50269633 | 48889601  (97.25%) | 36492468  (72.59%) | 25.41 | 93.52 |

1Reference genome: ARS_UCD1.3.

**Supplementary Figures**

**
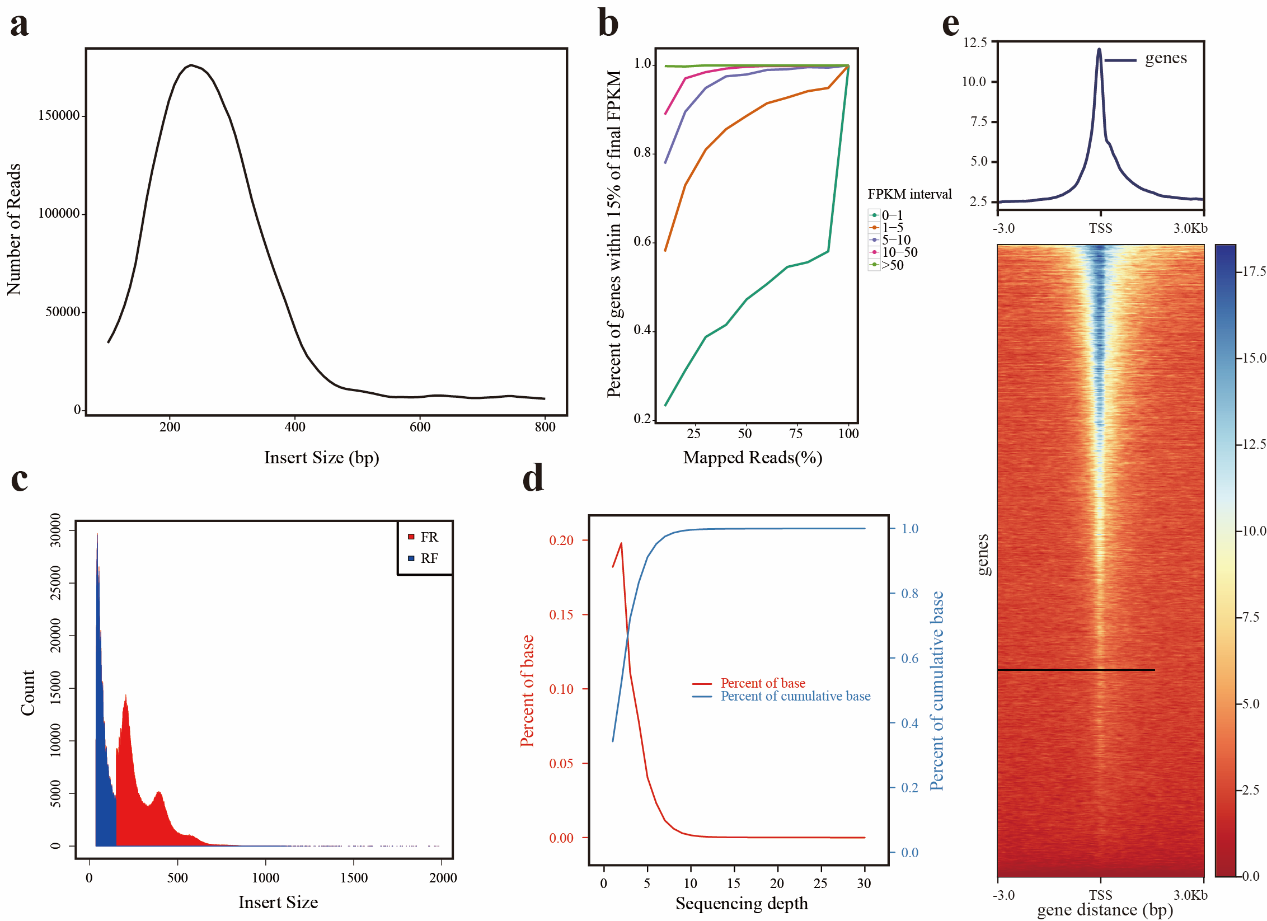
**

Fig. S1 The quality control for RNA-Seq and ATAC-Seq data.

**a** Simulated distribution plot of RNA-Seq insert fragment lengths. The x-axis represents the distance between the alignment start and end points of paired-end reads on the reference genome, ranging from 0 to 800bp. The y-axis represents the count of paired-end reads or insert fragments at different distances between the alignment start and end points.

**b** Simulated transcriptome data saturation plot. The x-axis represents the percentage of reads mapped to the genome out of the total mapped reads for a given data subsampling. The y-axis represents the percentage of genes with expression differences less than 15% within each FPKM range, based on all sampling results. Values approaching 1 indicate higher saturation of expression. Each colored line represents the saturation curve of gene expression levels at different levels in the sample.

**c** Simulated distribution plot of ATAC-Seq insert fragment lengths. The x-axis represents the distance between the alignment start and end points of paired-end reads on the reference genome, ranging from 0 to 1000bp. The y-axis represents the count of paired-end reads or insert fragments at different distances between the alignment start and end points.

**d** Plot of sequencing depth distribution for ATAC-Seq. The x-axis represents the sequencing depth, the left y-axis represents the percentage of bases corresponding to that depth (indicated by the red curve), and the right y-axis represents the percentage of bases at or below that depth (indicated by the blue curve).

**e** TSS enrichment plots of ATAC-Seq experiments.

**References:**

1. Foley C, Chapwanya A, Callanan JJ, Whiston R, Miranda-CasoLuengo R, Lu J, et al. Integrated analysis of the local and systemic changes preceding the development of post-partum cytological endometritis. BMC Genomics. 2015; 16(1):

2. Elis S, Desmarchais A, Freret S, Maillard V, Labas V, Cognié J, et al. Effect of a long-chain n-3 polyunsaturated fatty acid–enriched diet on adipose tissue lipid profiles and gene expression in Holstein dairy cows. J. Dairy Sci. 2016; 99(12): 10109–10127.

3. Tanaka K, Takizawa T, Dorji T, Amano T, Mannen H, Maeda Y, et al. Polymorphisms in the bovine hemoglobin-beta gene provide evidence for gene-flow between wild species of Bos (Bibos) and domestic cattle in Southeast Asia. Animal Science Journal. 2011; 82(1): 36–45.

4. Ibeagha-Awemu EM, Bissonnette N, Do DN, Dudemaine P-L, Wang M, Facciuolo A, et al. Regionally Distinct Immune and Metabolic Transcriptional Responses in the Bovine Small Intestine and Draining Lymph Nodes During a Subclinical Mycobacterium avium subsp. paratuberculosis Infection. Frontiers in Immunology. 2021; 12:

5. Perego MC, Morrell BC, Zhang L, Schütz LF, and Spicer LJ. Developmental and hormonal regulation of ubiquitin-like with plant homeodomain and really interesting new gene finger domains 1 gene expression in ovarian granulosa and theca cells of cattle. J. Anim. Sci. 2020; 98(7):
